# Supplementary material for: Industrial Scale Direct Liquefaction of E. globulus Biomass
Source: MDPI journal article supplement (doi:10.3390/catal13101379), 2023-10-19
Supplement: s1 [file s1]

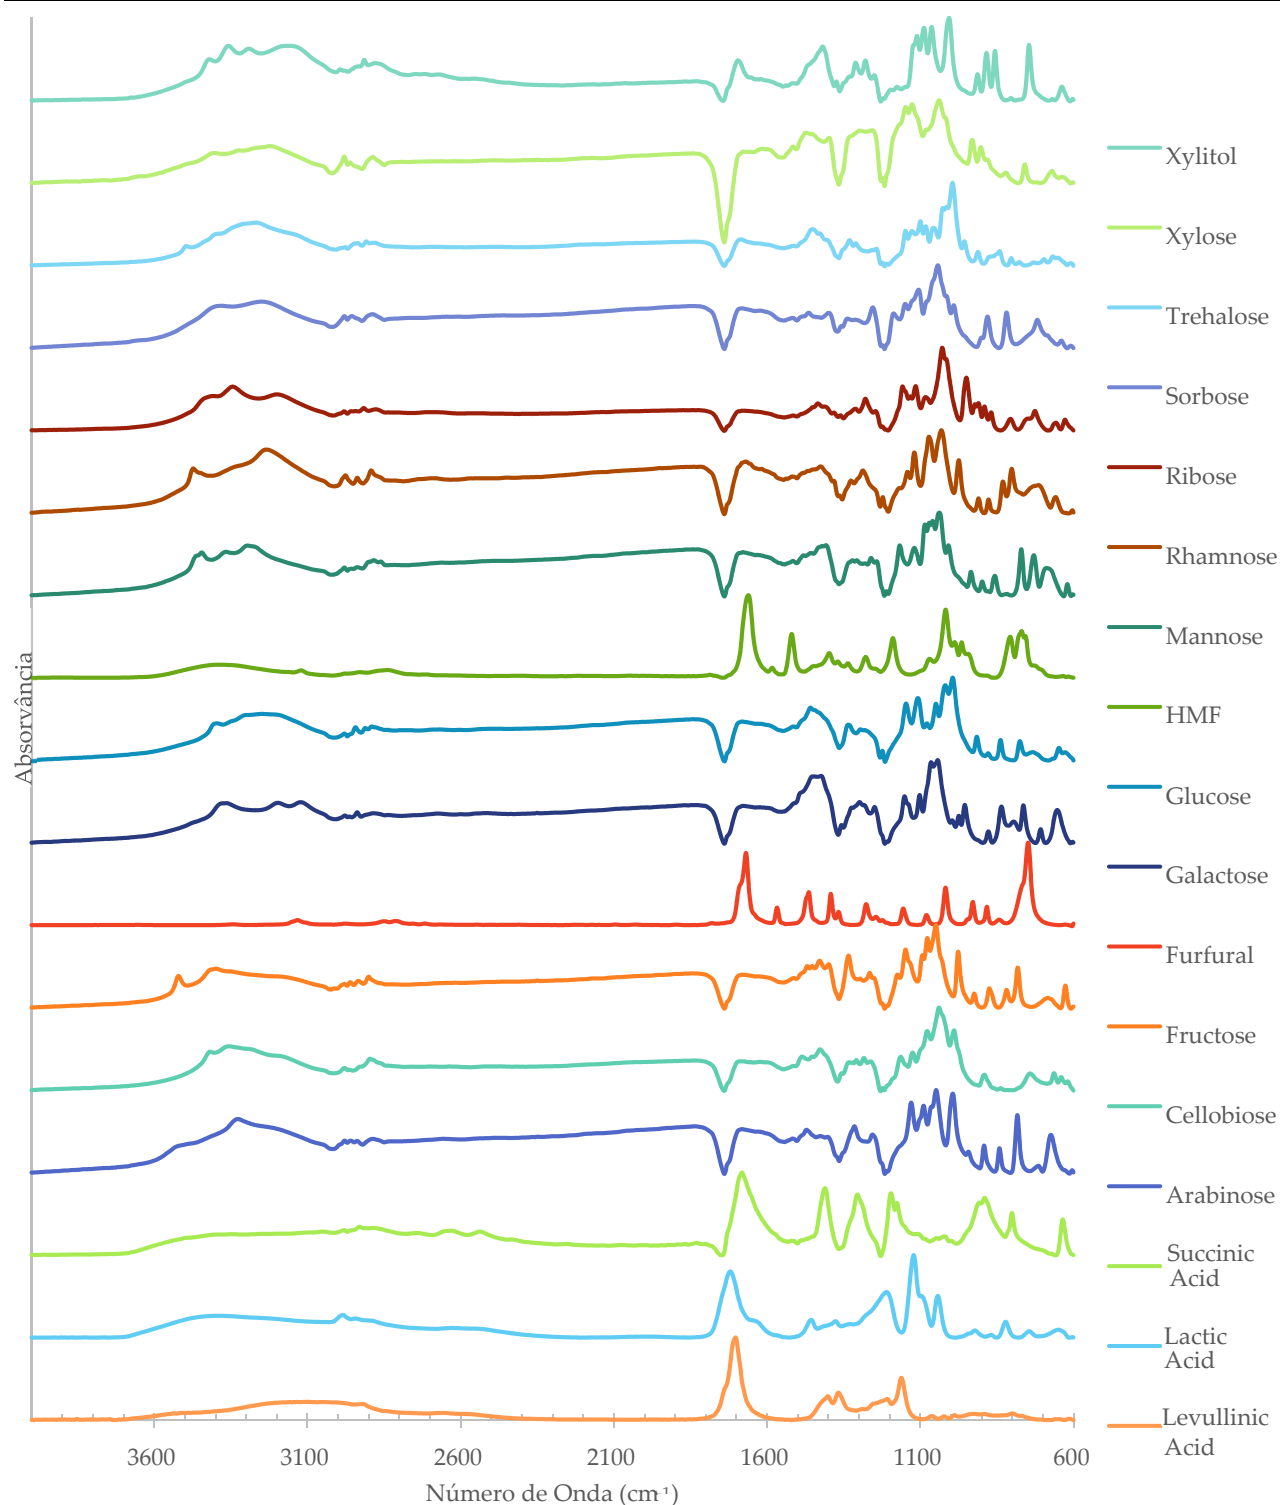

**Figure S1.** FTIR Spectrum of Sugars Standards.

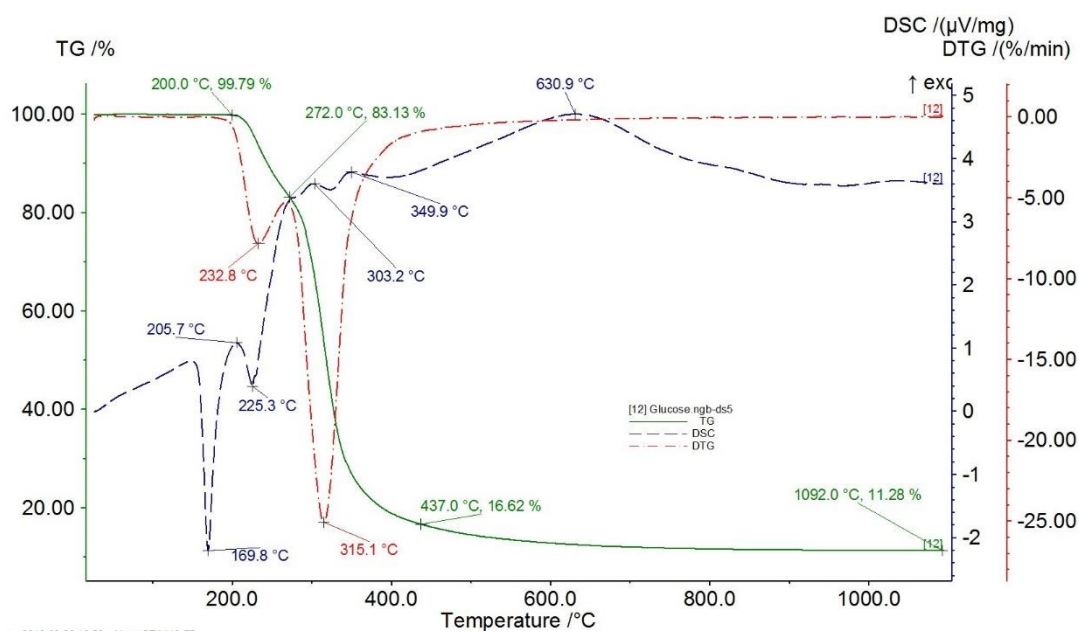

Figure S2. TG/DTG/DSC of glucose.

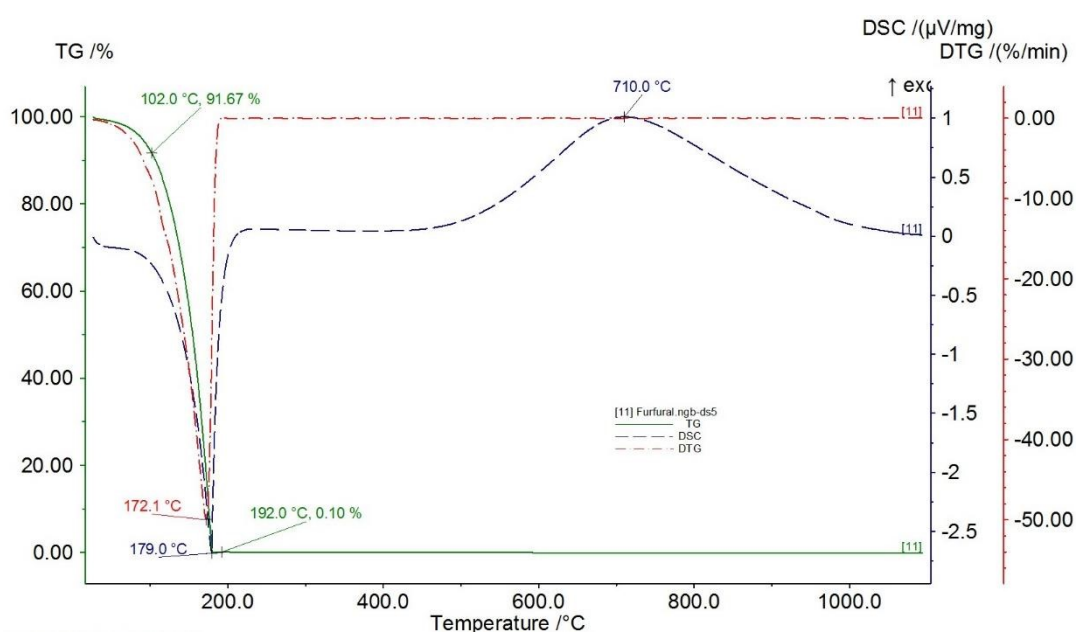

Figure S3. Curva de TG/DTG/DSC of furfural.

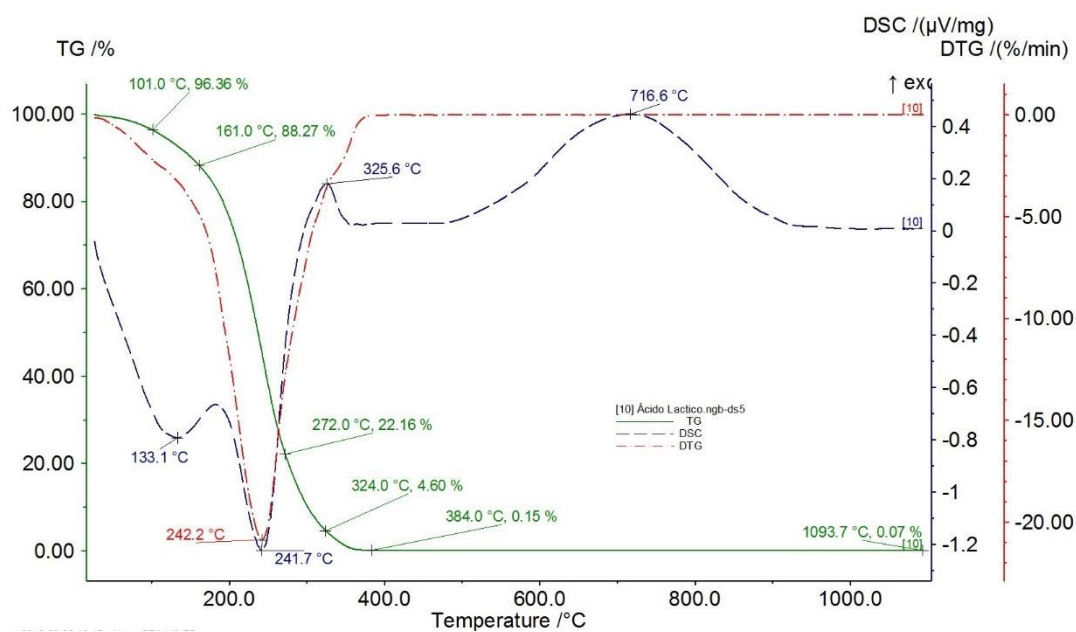

Figure S4. TG/DTG/DSC of lactic acid.

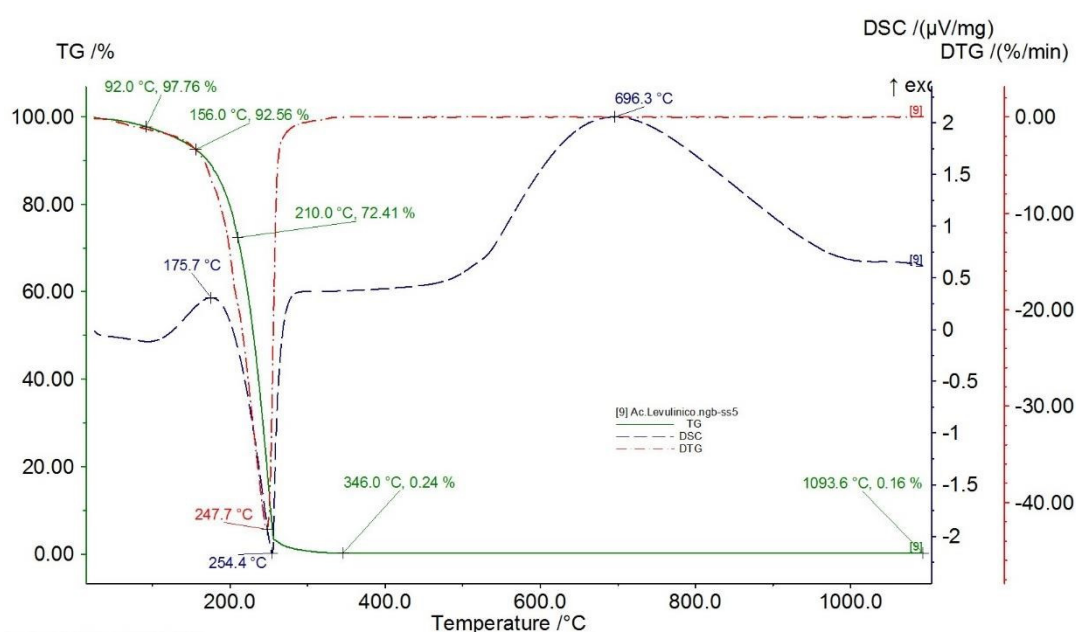

Figure S5. TG/DTG/DSC of Levulinic acid.

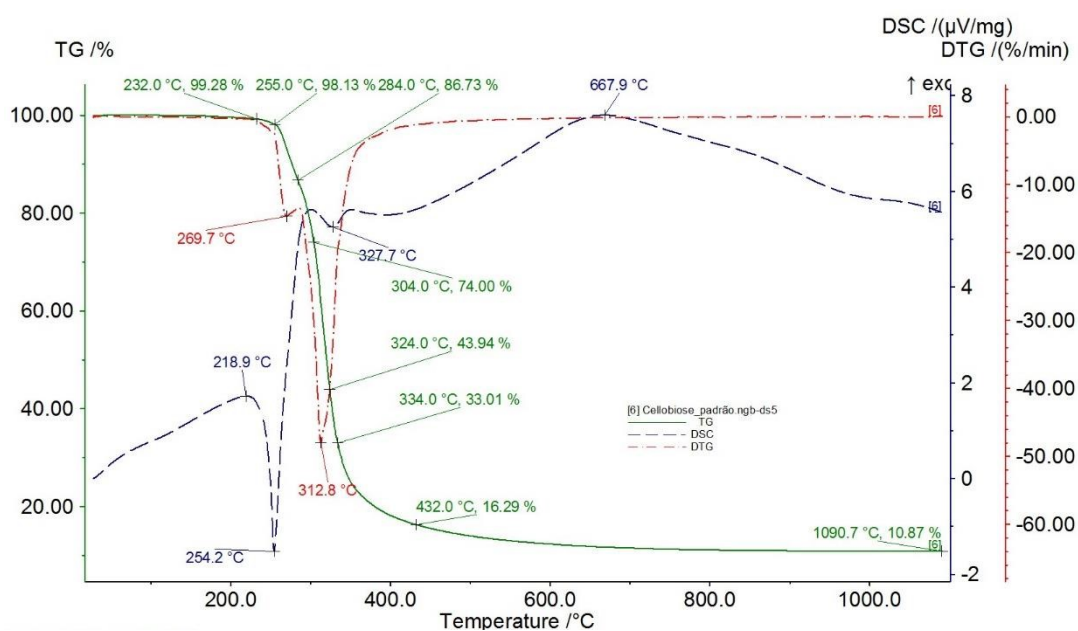

Figure S6. TG/DTG/DSC of cellobiose.

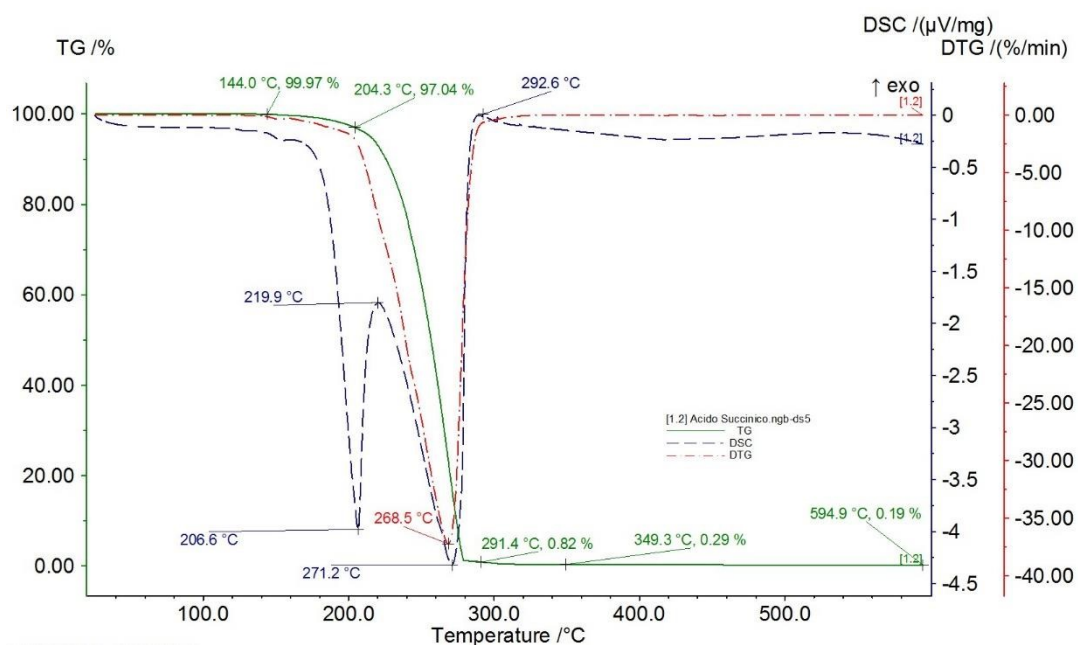

Figure S7. TG/DTG/DSC of Succinic Acid.

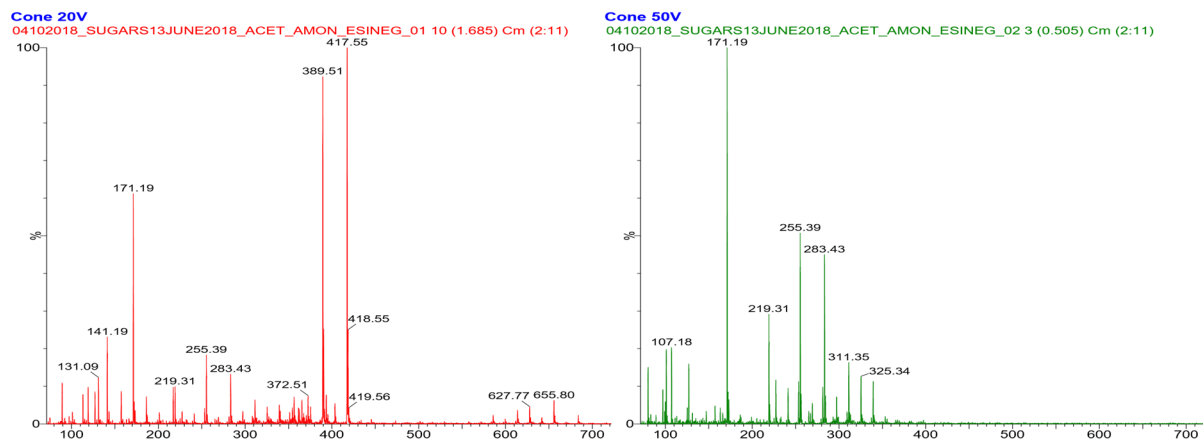

**Figure S8.** Mass spectrum of the sugar solution from the third reaction by direct infusion: cone 20V (left) and 50V (right).

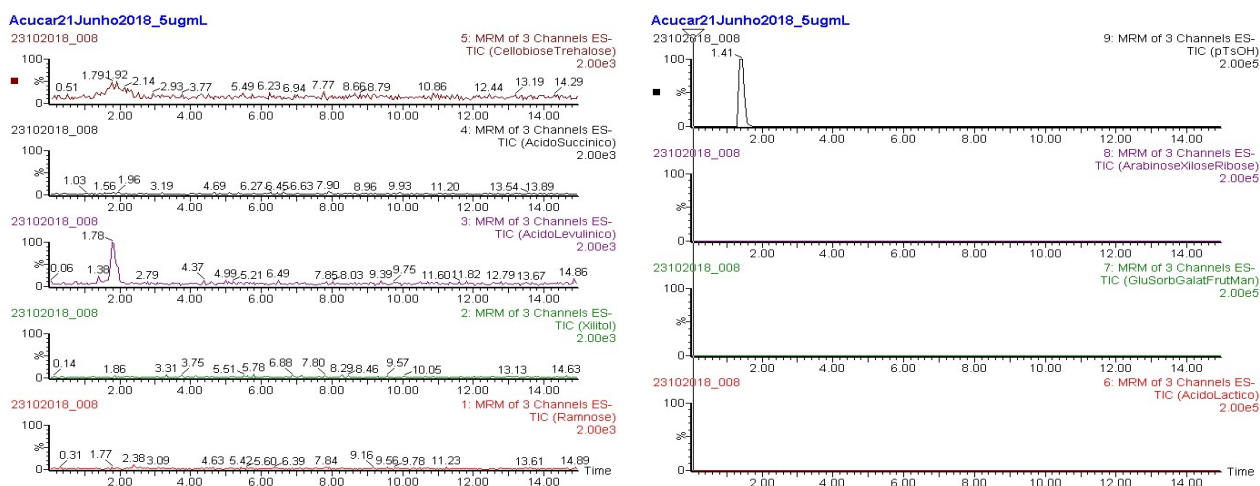

**Figure S9.** HPLC Chromatogram for all standards sugars (TIC - Total Ion Count).
